# Supplementary figures and images for: Variability assessment of 15N metabolic labeling-based proteomics workflow in mouse plasma and brain
Source: Royal Society of Chemistry journal article supplement (doi:10.1039/c4mb00702f), 2015-03-06

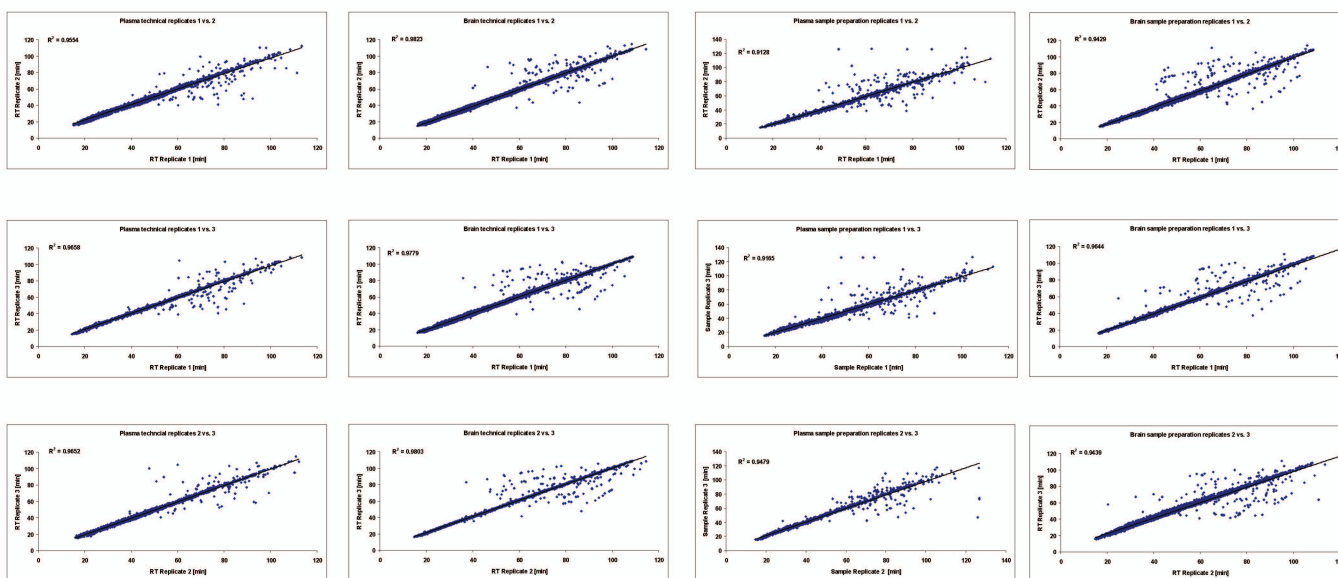

**A**

**D**

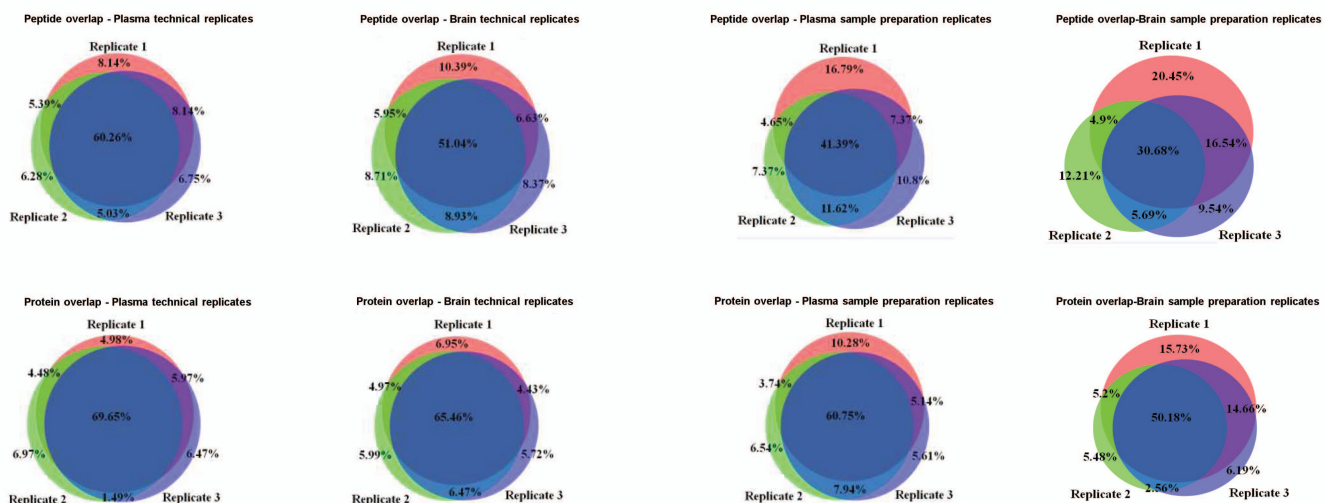

**B**

**E**

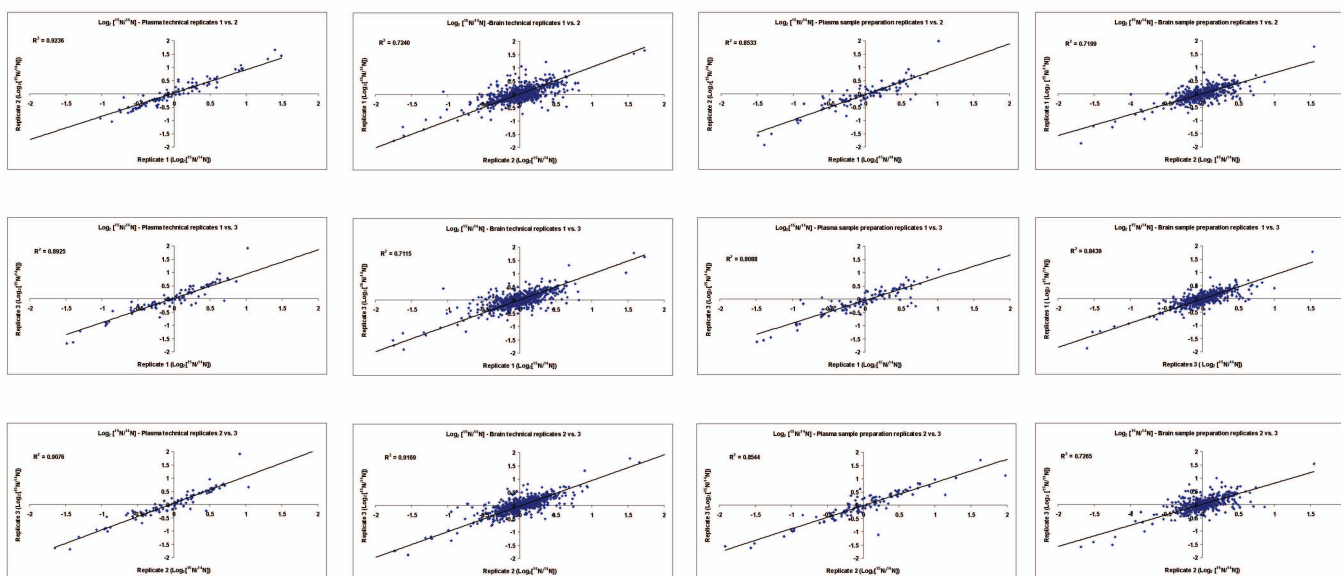

**C**

**F**

**A**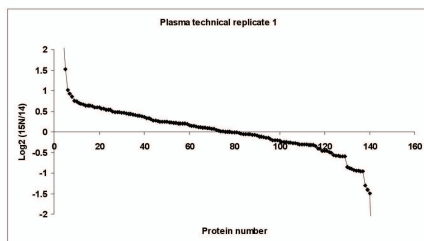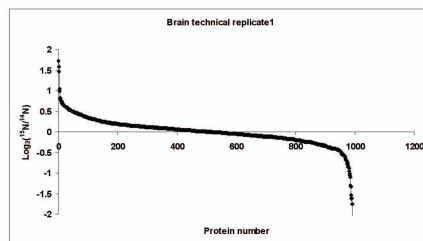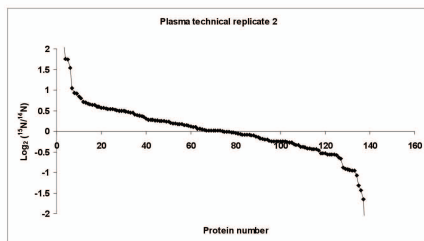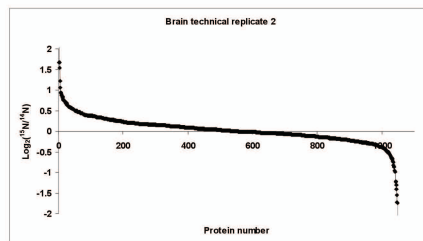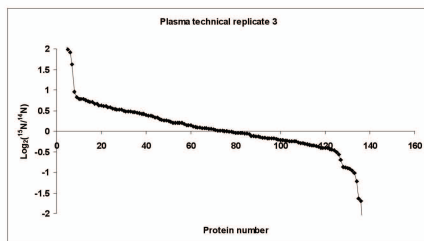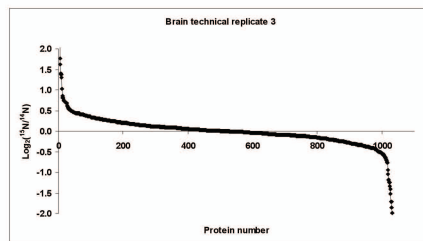**B**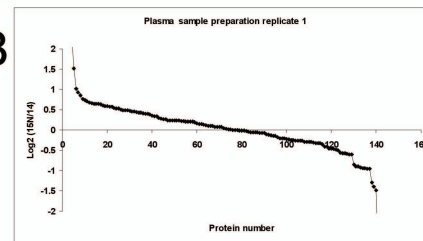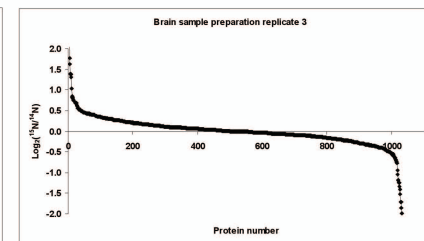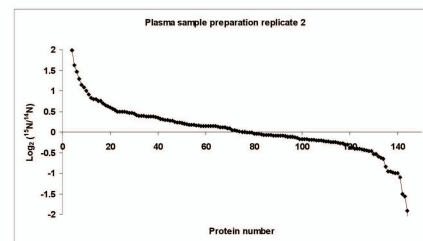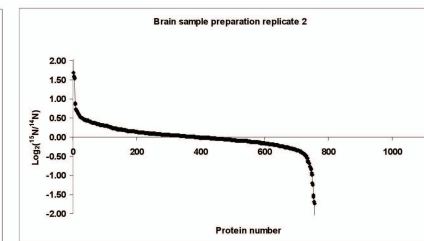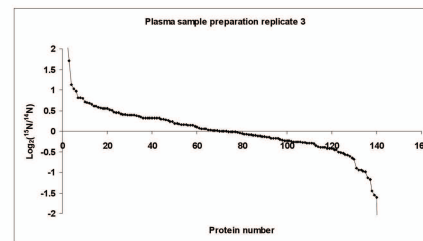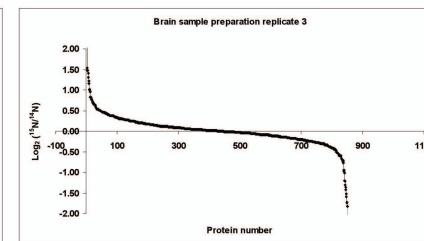

Supplement: c4mb00702f2.pdf [file c4mb00702f2.pdf]
